# Supplementary material for: Unveiling the interaction profile of rosmarinic acid and its bioactive substructures with serum albumin
Source: PubMed Central journal article supplement (PMC7144280; doi:10.1080/14756366.2020.1740923), 2020-03-23
Supplement: IENZ_A_1740923_SM9522.pdf [file IENZ_A_1740923_SM9522.pdf]

## Supporting Information

# Unveiling the interaction profile of rosmarinic acid and its bioactive substructures with serum albumin

Christina Papaemmanouil<sup>1</sup>, Maria V. Chatziathanasiadou<sup>1</sup>, Christos Chatzigiannis<sup>1</sup>, Eleni Chontzopoulou<sup>2</sup>, Thomas Mavromoustakos<sup>2</sup>, Simona Golic Grdadolnik<sup>3</sup>, Andreas G. Tzakos<sup>1</sup>

<sup>1</sup>Department of Chemistry, Section of Organic Chemistry and Biochemistry, University of Ioannina, Ioannina 45110, Greece

<sup>2</sup>Department of Chemistry, National and Kapodistrian University of Athens, Panepistimiopolis Zografou 15771, Greece

<sup>3</sup>Laboratory of Biomolecular Structure, Theory Department, National Institute of Chemistry, Hajdrihova 19, 1001 Ljubljana, Slovenia

### Table of Contents

|                                                                                                                               |           |
|-------------------------------------------------------------------------------------------------------------------------------|-----------|
| <b>A. Characterization of salvianic acid</b> .....                                                                            | <b>32</b> |
| <b>A1. HPLC chromatograms from the purification of salvianic acid</b> .....                                                   | <b>32</b> |
| <b>A2. 1HNMR spectrum of salvianic acid</b> .....                                                                             | <b>54</b> |
| <b>A3. HSQC-HMBC spectrum of salvianic acid</b> .....                                                                         | <b>54</b> |
| <b>B. Stern-Volmer analysis of the fluorescence spectroscopic data</b> .....                                                  | <b>76</b> |
| <b>C. Characterization of the BSA interaction with rosmarinic, caffeic and salvianic acid through STD and NOESY NMR</b> ..... | <b>76</b> |
| <b>C1. Epitope mapping of the BSA interaction with caffeic and salvianic acid</b> .....                                       | <b>76</b> |
| <b>C1a. Epitope mapping of the BSA-caffeic acid interaction</b> .....                                                         | <b>76</b> |
| <b>C1b. Epitope mapping of the BSA-salvianic acid interaction</b> .....                                                       | <b>76</b> |

Formatted: Font: Bold

Formatted: Hyperlink, Font: Bold, English (United States), Check spelling and grammar

Formatted: Font: Bold

Formatted: Hyperlink, Font: Bold, English (United States), Check spelling and grammar

Formatted: Font: Bold

Formatted: Hyperlink, Font: Bold, English (United States), Check spelling and grammar

Formatted: Font: Bold

Formatted: Font: Bold

Formatted: TOC 1

Formatted: Default Paragraph Font, Greek, Check spelling and grammar

|                                                                                                                   |             |
|-------------------------------------------------------------------------------------------------------------------|-------------|
| <b><u>C2. NOESY spectra of rosmarinic, caffeic and salvianic acid in the presence or absence of BSA</u></b> ..... | <b>87</b>   |
| <b><u>C2a. NOESY spectra of rosmarinic acid</u></b> .....                                                         | <b>98</b>   |
| <b><u>C2b. NOESY spectra of caffeic acid</u></b> .....                                                            | <b>109</b>  |
| <b><u>C2c. NOESY spectra of salvianic acid</u></b> .....                                                          | <b>1140</b> |
| <b><u>C3. STD NMR data of competitive experiments</u></b> .....                                                   | <b>1312</b> |
| <b><u>C3a. STD NMR spectra and STD amplification factors of warfarin</u></b> .....                                | <b>1312</b> |
| <b><u>C3b. STD NMR spectra and STD amplification factors of ibuprofen</u></b> .....                               | <b>1413</b> |
| <b><u>B3c. STD amplification factors of rosmarinic acid in the presence of warfarin/ibuprofen</u></b> .....       | <b>1413</b> |
| <b><u>C3d. STD amplification factors of caffeic acid in the presence of warfarin/ibuprofen</u></b> .....          | <b>1514</b> |
| <b><u>C3e. STD amplification factors of salvianic acid in the presence of warfarin/ibuprofen</u></b> .....        | <b>1514</b> |
| <b><u>D. Isothermal titration calorimetry</u></b> .....                                                           | <b>1716</b> |
| <b><u>E. Molecular Docking to the main active sites of BSA</u></b> .....                                          | <b>1817</b> |
| <b><u>E1. Interaction of rosmarinic acid with Sudlow site I</u></b> .....                                         | <b>1918</b> |
| <b><u>E3. Interaction of salvianic acid with Sudlow site I</u></b> .....                                          | <b>1918</b> |
| <b><u>E4. Interaction of warfarin with Sudlow site I</u></b> .....                                                | <b>2019</b> |
| <b><u>E5. Interaction of ibuprofen with Sudlow site II</u></b> .....                                              | <b>2120</b> |
| <b><u>A. Characterization of salvianic acid</u></b> .....                                                         | <b>2</b>    |

Formatted: Font: (Default) +Body (Calibri)

## A. Characterization of salvianic acid

### A1. HPLC chromatograms from the purification of salvianic acid

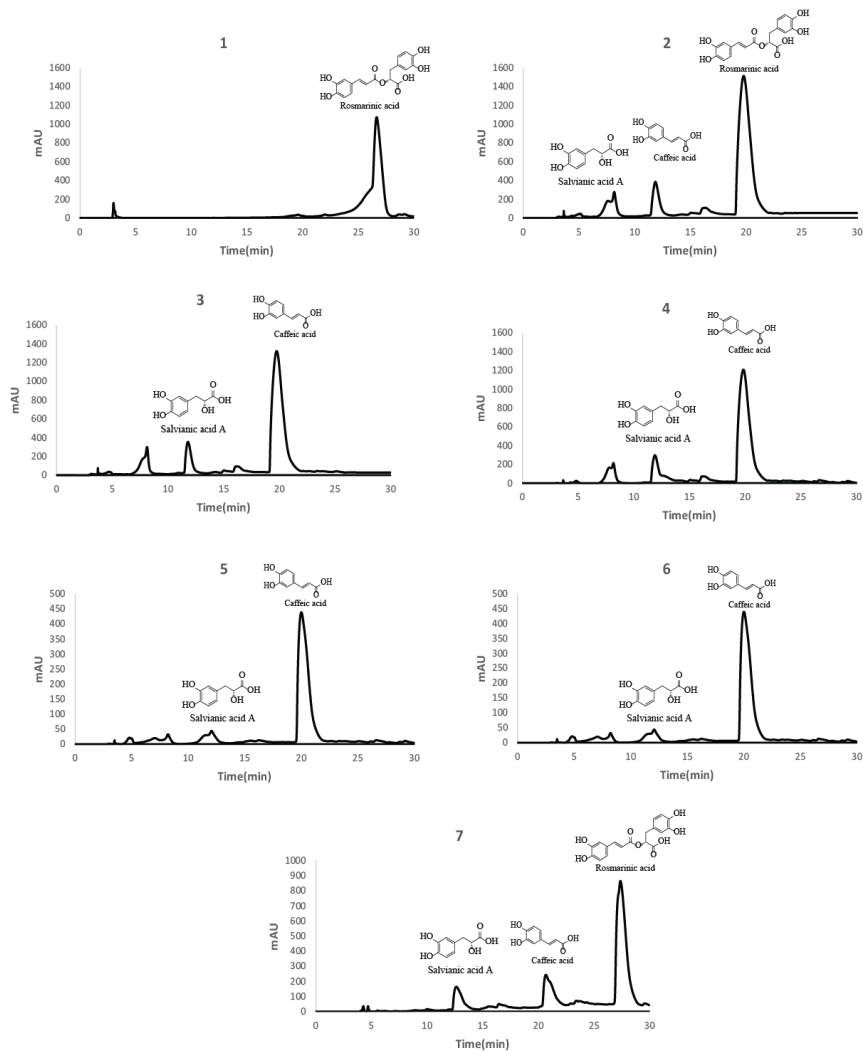

**Figure S1.** HPLC chromatograms from the purification of salviamic acid. (1): NaOH 0.1 M, 1 h; (2): NaOH 1 M, 4 h; (3): NaOH 1 M, 8 h; (4): NaOH 1 M, 12 h; (5): NaOH 1 M, 4 h; (6): NaOH 1 M, 8 h; (7): NaOH 0.1 M, 4h; The desired product's elution time is at 12.6 min, caffeic acid is eluted at 21 min and non-hydrolyzed rosmarinic acid is eluted at 27 min with gradient elution system MeOH–H<sub>2</sub>O containing 0.1percent TFA (40-100% MeOH).

A2.  $^1\text{H}$ NMR spectrum of salviatic acid

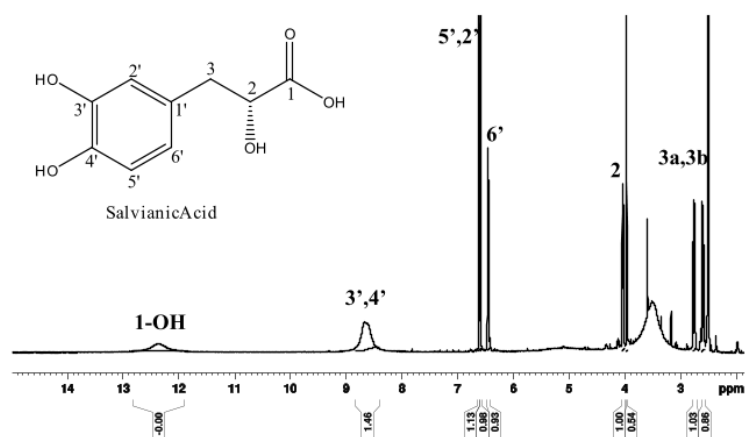

**Figure S2.**  $^1\text{H}$ NMR spectrum of salviatic acid in  $\text{DMSO-d}_6$ , 298K, recorded at 500 MHz.

A3. HSQC-HMBC spectrum of salviatic acid

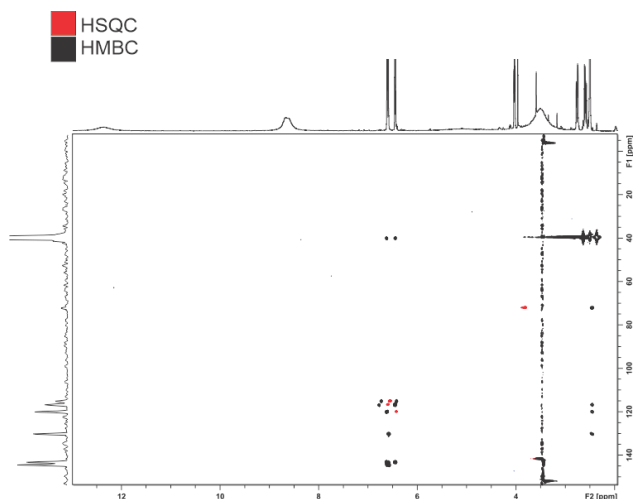

**Figure S3.** HSQC-HMBC overlay of salviatic acid in DMSO-d<sub>6</sub>, 298K, recorded at 500 MHz.

### B. Stern-Volmer analysis of the fluorescence spectroscopic data

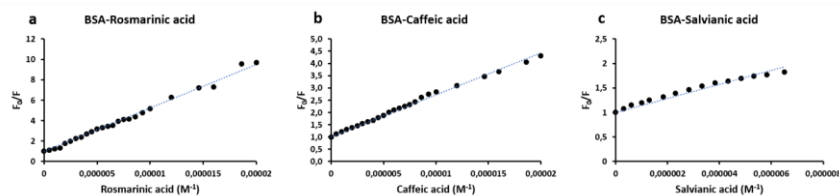

**Figure S34.**  $F_0/F$  as a function of A) Rosmarinic B) Caffeic and C) Salviatic acid concentration for the calculation of the Stern–Volmer quenching constant,  $K_{SV}$  at room temperature.

**Table S1.** The quenching constants of BSA in the presence of rosmarinic, caffeic and salviatic acid.

| Compound        | $K_{SV} (10^4 \text{ L mol}^{-1})$ | $K_q (10^{13} \text{ L mol}^{-1} \text{ s}^{-1})$ | $R^2$ |
|-----------------|------------------------------------|---------------------------------------------------|-------|
| Rosmarinic acid | 42.4                               | 4.2                                               | 0.99  |
| Caffeic acid    | 17.1                               | 1.7                                               | 0.99  |
| Salviatic acid  | 14.3                               | 1.4                                               | 0.95  |

Formatted: Subscript

Formatted: Centered

Formatted: Not Superscript/ Subscript

Formatted: Superscript

Formatted Table

Formatted: Superscript

Formatted: Not Superscript/ Subscript

Formatted: Subscript

Formatted: Superscript

Formatted: Superscript

Formatted: Superscript

Formatted: Superscript

Formatted: Centered

Formatted: Centered

Formatted: Centered

**B<sub>C</sub>**. Characterization of the BSA interaction with rosmarinic, caffeic and salvianic acid through STD and NOESY NMR.

**B<sub>1</sub>C<sub>1</sub>**. Epitope mapping of the BSA interaction with caffeic and salvianic acid

**B<sub>1a</sub>C<sub>1a</sub>**. Epitope mapping of the BSA-caffeic acid interaction

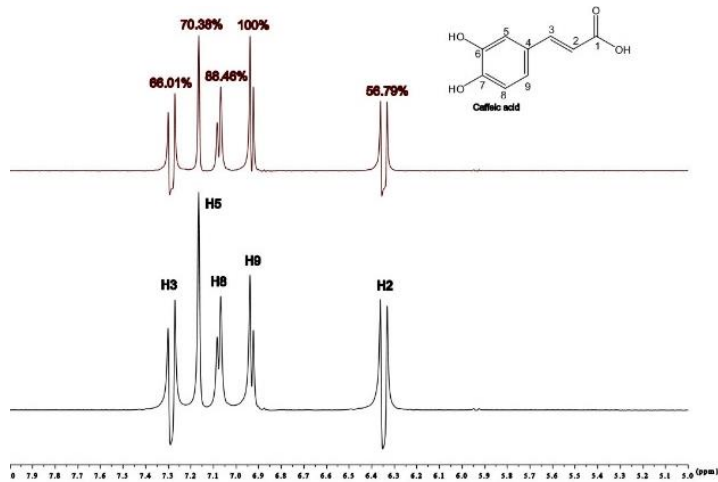

**Figure S4S5.** (a) <sup>1</sup>H NMR reference spectrum of the complex caffeic acid (2 mM)-BSA (20 μM) in Tris-*d*<sub>11</sub> buffer 10 mM, pH=7.4 with 600 μl D<sub>2</sub>O. (b) STD difference NMR spectrum of the complex caffeic acid-BSA. The percentage values show the STD<sub>AMP</sub> for all the protons of caffeic acid.

**B<sub>1b</sub>C<sub>1b</sub>**. Epitope mapping of the BSA-salvianic acid interaction

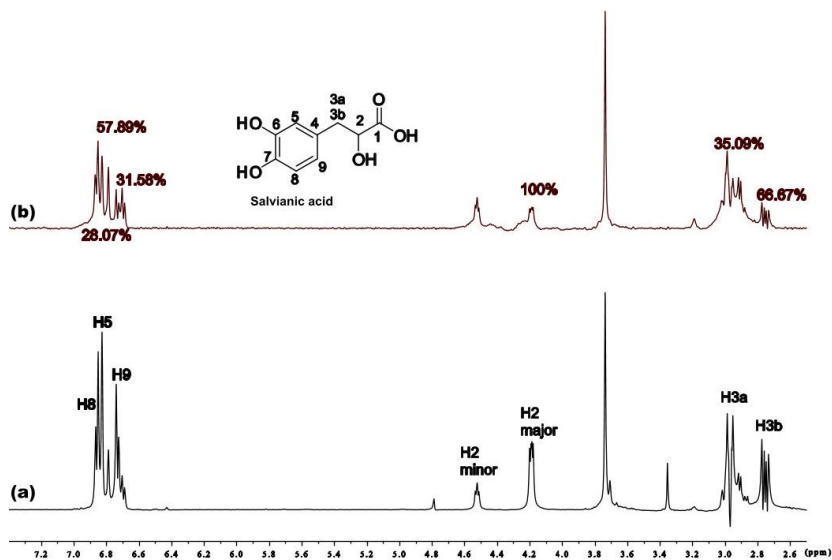

**Figure S5S6.** (a) <sup>1</sup>H NMR reference spectrum of the complex salviamic acid (2 mM)-BSA (20 μM) in Tris-*d*<sub>11</sub> buffer 10 mM, pH=7.4 with 600 μL D<sub>2</sub>O. (b) STD difference NMR spectrum of the complex salviamic acid-BSA. The percentage values show the STD<sub>AMP</sub> for all the protons of salviamic acid.

**B2C2.** NOESY spectra of rosmarinic, caffeic and salviamic acid in the presence or absence of BSA

**B2aC2a.** NOESY spectra of rosmarinic acid

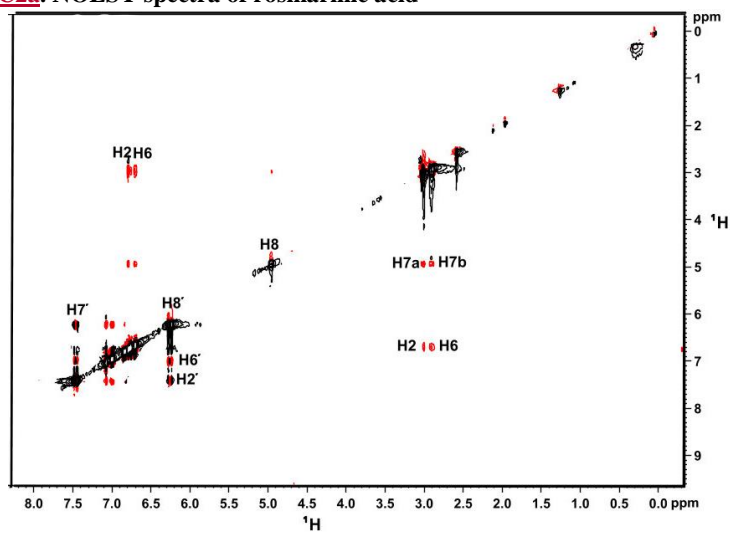

**Figure S6S7.** Expanded region of NOESY spectrum of the rosmarinic acid, recorded with mixing time of 800 ms at 500 MHz, showing the presence of negative-positive NOEs of free ligand (different sign than the diagonal).

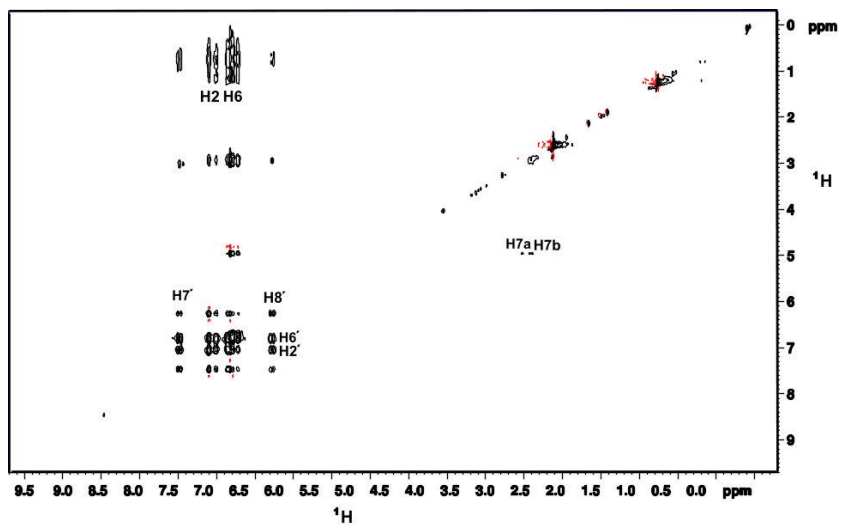



**Figure S7S8.** Expanded region of tr- NOESY spectrum of the complex rosmarinic acid-BSA, recorded with mixing time of 800 ms at 500 MHz, showing the presence of positive-negative NOEs of bound ligand (same sign as the diagonal).

**B2bC2b.** NOESY spectra of caffeic acid

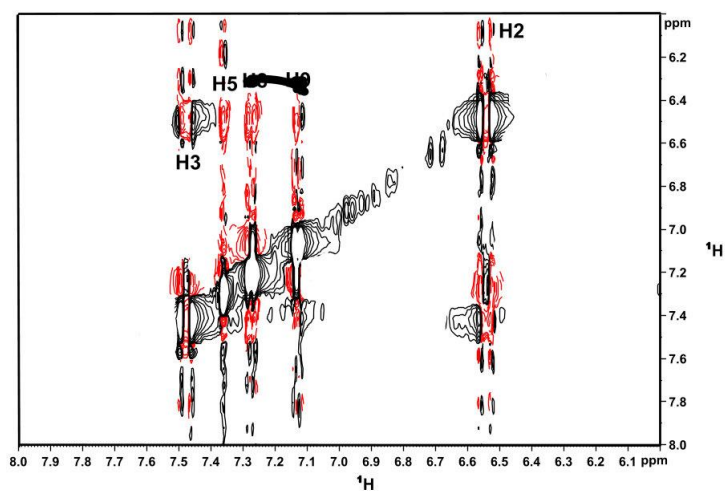

**Figure S8S9.** Expanded region of NOESY spectrum of the caffeic acid, recorded with mixing time of 800 ms at 500 MHz, showing the presence of negative-positive NOEs of free ligand (different sign than the diagonal).

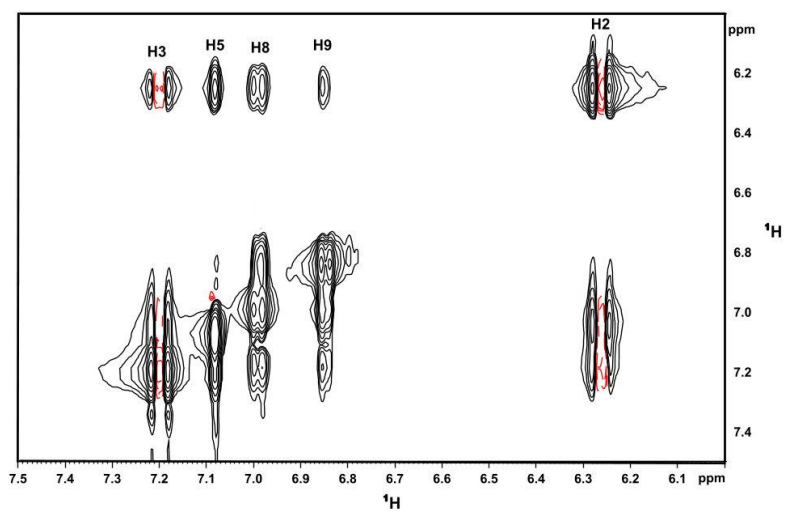

**Figure S9S10.** Expanded region of tr- NOESY spectrum of the complex caffeic acid-BSA, recorded with mixing time of 800 ms at 500 MHz, showing the presence of positive-negative NOEs of bound ligand (same sign as the diagonal).

**B2eC2c.** NOESY spectra of salvianic acid

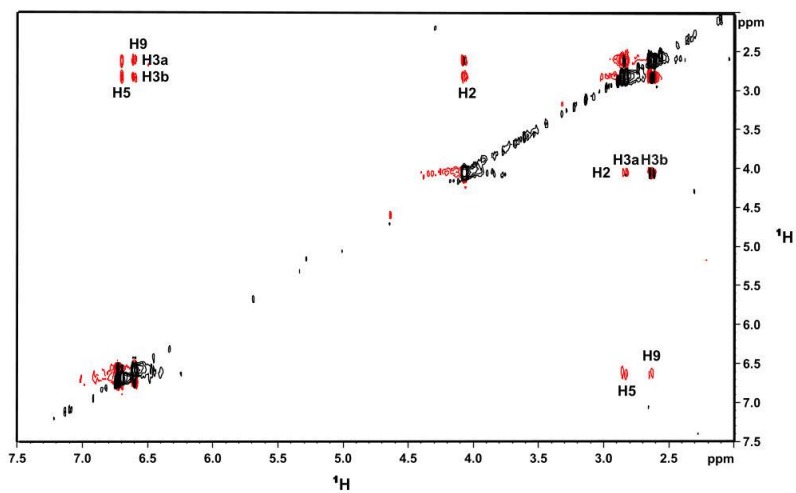

**Figure S10S11.** Expanded region of NOESY spectrum of the salviatic acid, recorded with mixing time of 800 ms at 500 MHz, showing the presence of ~~negative-positive~~ NOEs of the free ligand (different sign than the diagonal).

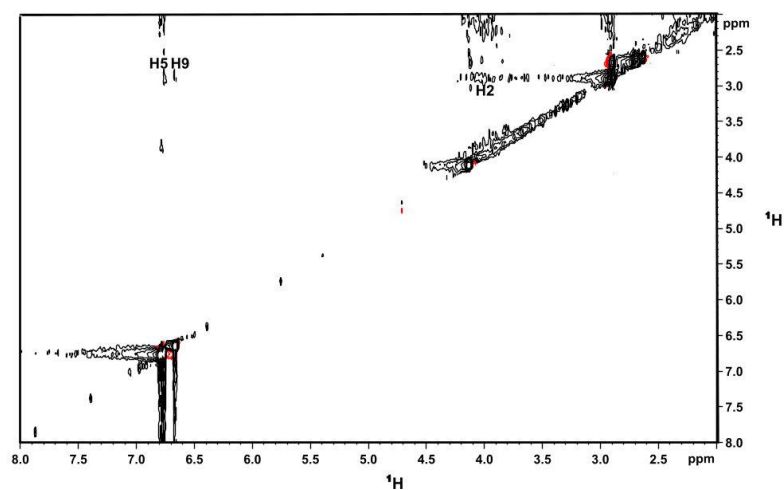

**Figure S11S12.** Expanded region of tr- NOESY spectrum of the complex salvianic acid-BSA, recorded with mixing time of 800 ms at 500 MHz, showing the presence of positive-negative NOEs of bound ligand (same sign as the diagonal).

### B3C3. STD NMR data of competitive experiments

#### B3aC3a. STD NMR spectra and STD amplification factors of warfarin

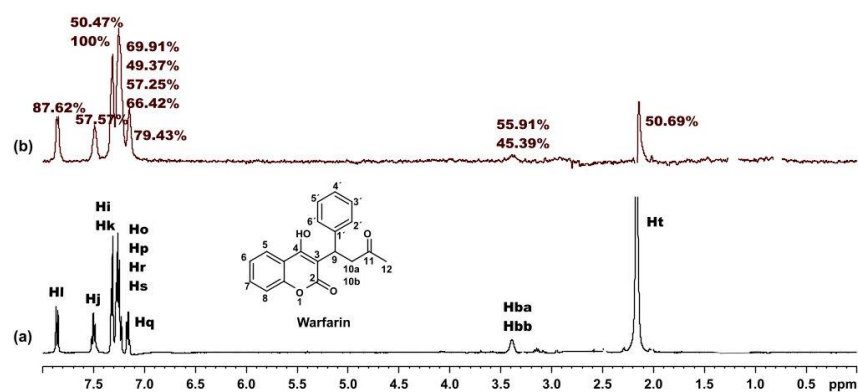

**Figure S12S13.** (a)  $^1\text{H}$  NMR reference spectrum of the complex warfarin (2 mM)-BSA (50  $\mu\text{M}$ ) in PBS buffer 10 mM, pH=7.4 with 600  $\mu\text{l}$   $\text{D}_2\text{O}$ . (b) STD difference NMR spectrum of the complex warfarin-BSA.

**B3bC3b.** STD NMR spectra and STD amplification factors of ibuprofen

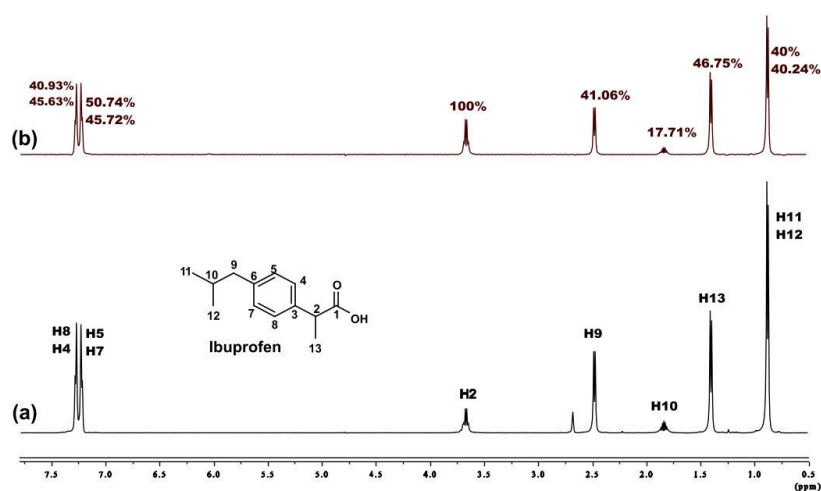

**Figure S13S14.** (a)  $^1\text{H}$  NMR reference spectrum of the complex ibuprofen (2 mM)-BSA (20  $\mu\text{M}$ ) in Tris- $\text{d}_{11}$  buffer 10 mM, pH=7.4 with 600  $\mu\text{L}$   $\text{D}_2\text{O}$ . (b) STD difference NMR spectrum of the complex ibuprofen-BSA.

**B3c.** STD amplification factors of rosmarinic acid in the presence of warfarin/ibuprofen

**Table S1S2.**  $\text{STD}_{\text{AMP}}$  factors occurring from the titrations of rosmarinic acid with warfarin.

| Proton/Concentration | STDAMP factors for Rosmarinic Acid |               |               |               |               |
|----------------------|------------------------------------|---------------|---------------|---------------|---------------|
|                      | 0 mM warfarin                      | 2 mM warfarin | 4 mM warfarin | 6 mM warfarin | 8 mM warfarin |
| H7'                  | 27.32%                             | 26.54%        | 24.87%        | 22.32%        | 20.85%        |
| H5'                  | 22.25%                             | 21.32%        | 19.98%        | 17.65%        | 16.39%        |
| H2'                  | 27.45%                             | 26.39%        | 22.88%        | 23.33%        | 18.91%        |
| H6'                  | 22.65%                             | 21.31%        | 20.83%        | 19.47%        | 18.09%        |
| H2                   | 34.87%                             | 34.60%        | 28.91%        | 22.87%        | 22.01%        |

|     |        |        |        |        |        |
|-----|--------|--------|--------|--------|--------|
| H5  | 19.09% | 18.09% | 14.51% | 13.80% | 13.31% |
| H6  | 24.20% | 23.53% | 17.66% | 15.57% | 7.79%  |
| H8  | 4.12%  | 4.08%  | 0      | 0      | 0      |
| H7a | 12.32% | 11.87% | 5.11%  | 4.91%  | 3.35%  |
| H7b | 20.32% | 19.85% | 12.99% | 11.98% | 9.86%  |

**Table S2S3.** STD<sub>AMP</sub> factors occurring from the titrations of rosmarinic acid with ibuprofen.

| Protons/Concentration | STD <sub>AMP</sub> of Rosmarinic acid |                |                |
|-----------------------|---------------------------------------|----------------|----------------|
|                       | 0 mM ibuprofen                        | 2 mM ibuprofen | 4 mM ibuprofen |
| H7'                   | 1.30%                                 | 2.86%          | 2.94%          |
| H5'                   | 4.20%                                 | 5.41%          | 6.08%          |
| H2'                   | 2.91%                                 | 3.55%          | 3.98%          |
| H6'                   | 3.05%                                 | 3.31%          | 3.40%          |
| H8'                   | 1.90%                                 | 2.54%          | 2.65%          |
| H2                    | 4.10%                                 | 4.51%          | 5.06%          |
| H5                    | 2.09%                                 | 2.44%          | 2.53%          |
| H6                    | 3.20%                                 | 3.46%          | 3.99%          |
| H8                    | 0.08%                                 | 0.11%          | 0.15%          |
| H7a                   | 0.21%                                 | 0.54%          | 0.82%          |
| H7b                   | 0.86%                                 | 1.04%          | 1.39%          |

**B3dC3d.** STD amplification factors of caffeic acid in the presence of warfarin/ibuprofen

**Table S3S4.** STD<sub>AMP</sub> factors occurring from the titrations of caffeic acid with warfarin.

| Proton/Concentration | STD <sub>AMP</sub> factors for Rosmarinic Acid |               |               |               |               |
|----------------------|------------------------------------------------|---------------|---------------|---------------|---------------|
|                      | 0 mM warfarin                                  | 2 mM warfarin | 4 mM warfarin | 6 mM warfarin | 8 mM warfarin |
| H3                   | 26.43%                                         | 25.7%         | 22.68%        | 18.32%        | 4.95%         |
| H5                   | 26.43%                                         | 25.19%        | 10.68%        | 9.80%         | 3.99%         |
| H8                   | 12.65%                                         | 11.44%        | 9.41%         | 8.21%         | 8.18%         |
| H9                   | 14.87%                                         | 13.15%        | 11.19%        | 11.14%        | 9.02%         |
| H2                   | 15.32%                                         | 14.44%        | 4.95%         | 4.68%         | 4.37%         |

**Table S4S5.** STD<sub>AMP</sub> factors occurring from the titrations of caffeic acid with ibuprofen.

| Protons/Concentration | STD <sub>AMP</sub> factors for Caffeic acid |                |                |
|-----------------------|---------------------------------------------|----------------|----------------|
|                       | 0 mM ibuprofen                              | 2 mM ibuprofen | 4 mM ibuprofen |
| H3                    | 11.48%                                      | 12.43%         | 23.10%         |
| H5                    | 19.65%                                      | 20.17%         | 21.62%         |
| H8                    | 30.54%                                      | 31.63%         | 38.82%         |
| H9                    | 25.76%                                      | 28.83%         | 35.23%         |
| H2                    | 22.87%                                      | 23.40%         | 38.41%         |

**B3eC3e.** STD amplification factors of salvianic acid in the presence of warfarin/ibuprofen

**Table S5S6.** STD<sub>AMP</sub> factors occurring from the titrations of salviatic acid with

| Proton/Concentration | STD <sub>AMP</sub> factors for Salviatic acid |               |               |
|----------------------|-----------------------------------------------|---------------|---------------|
|                      | 0 mM warfarin                                 | 2 mM warfarin | 4 mM warfarin |
| H8                   | 25.11%                                        | 0             | 0             |
| H5                   | 27.94%                                        | 0             | 0             |
| H9                   | 30%                                           | 0             | 0             |
| H2                   | 33.78%                                        | 0             | 0             |
| H3a                  | 13.49%                                        | 0             | 0             |

warfarin.

**Table S6S7.** STD<sub>AMP</sub> factors occurring from the titrations of salviatic acid with ibuprofen.

| Protons/Concentration | STD <sub>AMP</sub> factors for Salviatic acid |                |                |
|-----------------------|-----------------------------------------------|----------------|----------------|
|                       | 0 mM ibuprofen                                | 2 mM ibuprofen | 4 mM ibuprofen |
| H3a                   | 0.19%                                         | 0.26%          | 0.46%          |

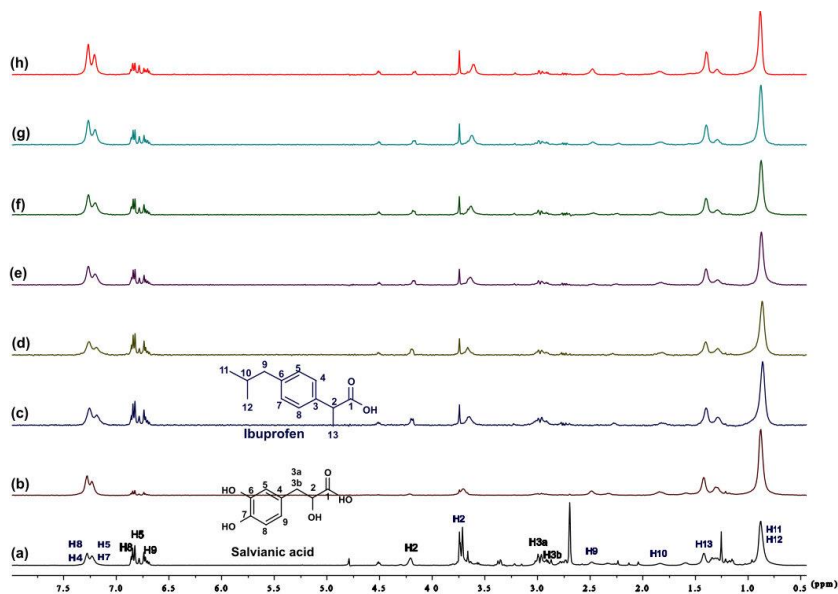

**Figure S14S15.** (a) <sup>1</sup>H NMR reference spectrum of the complex ibuprofen (2 mM)-BSA (20 μM), including salviatic acid 0.2 mM, in Tris-d<sub>11</sub> buffer 10 mM, pH=7.4 with 600 μl D<sub>2</sub>O. STD difference NMR spectrum of the complex ibuprofen-BSA, including:

(b) 0.2 mM salviatic acid (c) 0.4 mM salviatic acid (d) 0.8 mM salviatic acid (e) 1 mM salviatic acid (f) 1.5 mM salviatic acid (g) 2 mM salviatic acid (h) 3 mM salviatic acid.

**Table S7S8.**  $STD_{AMP}$  factors occurring from the titrations of the complex ibuprofen-BSA with salviatic acid.

| Proton/Concentration | $STD_{AMP}$ of Salviatic acid |        |        |       |         |       |       |
|----------------------|-------------------------------|--------|--------|-------|---------|-------|-------|
|                      | 0.2 mM                        | 0.4 mM | 0.8 mM | 1 mM  | 1.50 mM | 2 mM  | 3 mM  |
| H8                   | 0.03%                         | 0.06%  | 0.10%  | 0.14% | 0.17%   | 0.19% | 1.31% |
| H5                   | 0.05%                         | 0.07%  | 0.10%  | 0.16% | 0.21%   | 0.22% | 1.63% |
| H9                   | 0.05%                         | 0.06%  | 0.09%  | 0.14% | 0.19%   | 0.20% | 1.18% |
| H2 minor             | 0%                            | 0.08%  | 0.13%  | 0.17% | 0.23%   | 0.23% | 2.64% |
| H2 major             | 0%                            | 0.03%  | 0.09%  | 0.10% | 0.13%   | 0.15% | 1.17% |
| H3a                  | 0.01%                         | 0.02%  | 0.04%  | 0.04% | 0.10%   | 0.36% | 0.96% |
| H3b                  | 0.01%                         | 0.02%  | 0.02%  | 0.07% | 0.11%   | 0.15% | 0.83% |

**Graph S1.**  $STD_{AMP}$  factor values of representative protons of Ibuprofen, from the complex Ibuprofen (2 mM)- BSA (20  $\mu$ M), which is titrated with salviatic acid.

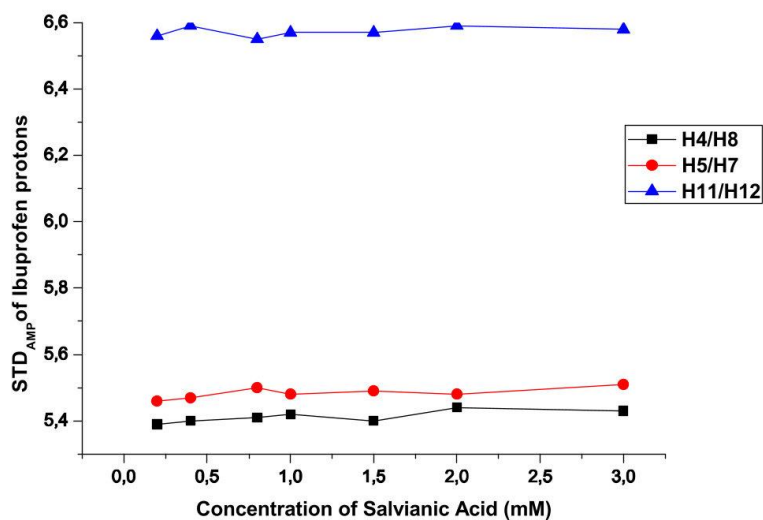

€D. Isothermal titration calorimetry



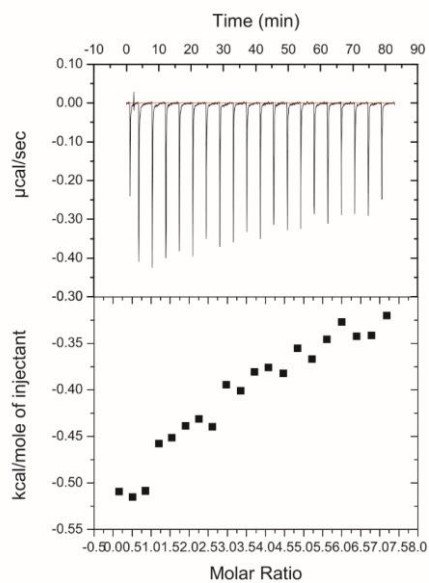

**Figure S15S16.** Isothermal titration calorimetry measurement for the interaction of BSA with Salvianic acid. The isotherm plot (up) and the integrated curve (down) are presented.

### **DE. Molecular Docking to the main active sites of BSA**

**Table S8S9.** Binding energies of the studied molecules in Sudlow site I in BSA.

| <b>Bovine Serum Albumin<br/>(PDB : 4F5S)</b> | <b>Sudlow Site I – Site IIA<br/>Docking Score<br/>(kcal/mol)</b> |
|----------------------------------------------|------------------------------------------------------------------|
| Rosmarinic acid                              | -13.545                                                          |
| Caffeic acid                                 | -11.583                                                          |
| Salvianic acid                               | -9.849                                                           |
| Warfarin                                     | -9.922                                                           |
| Ibuprofen                                    | -6.048                                                           |

**D1E1.** Interaction of rosmarinic acid with Sudlow site I

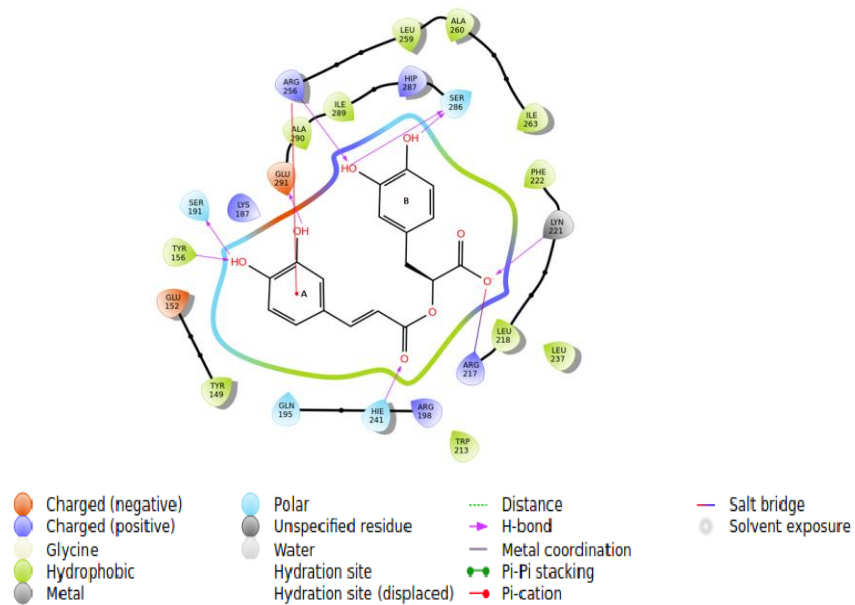

**Figure S16S17.** Binding interactions of rosmarinic acid in Sudlow site I of BSA.

**D3E3.** Interaction of salvianic acid with Sudlow site I

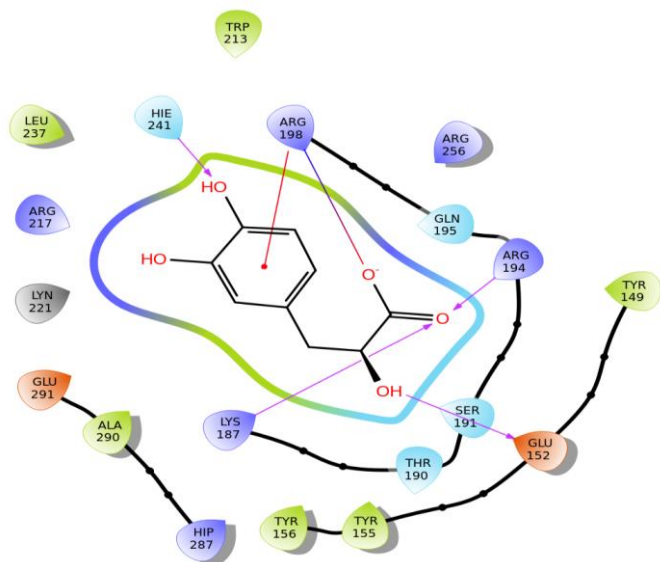

**Figure S17S18.** Binding interactions of salviatic acid in Sudlow site I of BSA.

#### **D4E4.** Interaction of warfarin with Sudlow site I

Warfarin shows a very favored binding value (Docking Score = -9.922 kcal / mol) in Sudlow site I (**Table S8S9**). Warfarin in its best pose conformation (**Figure S18S19, S19S20**) forms H – bonds with four residues of the protein (Arg194, Arg198, His241, Arg256). In addition, the formation of a salt bridge between Arg217 and the enol group of the ligand contributes to the stabilization of the molecule in the binding site. Importantly, there are strong coulombic interactions between Sudlow site I and warfarin and this makes the molecule to adopt preferable binding to this site.

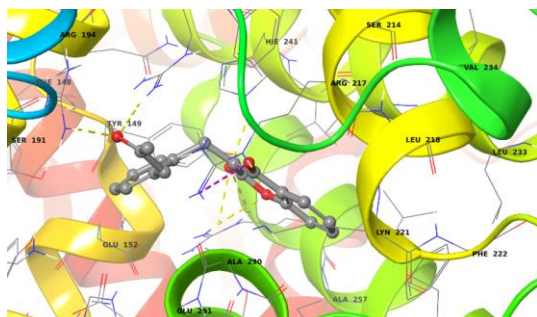

**Figure S18S19.** Best pose of warfarin in Sudlow site I. The four favorable hydrogen bonds, the salt bridge between Arg217 and the enol group of the ligand can explain its highly favorable binding.

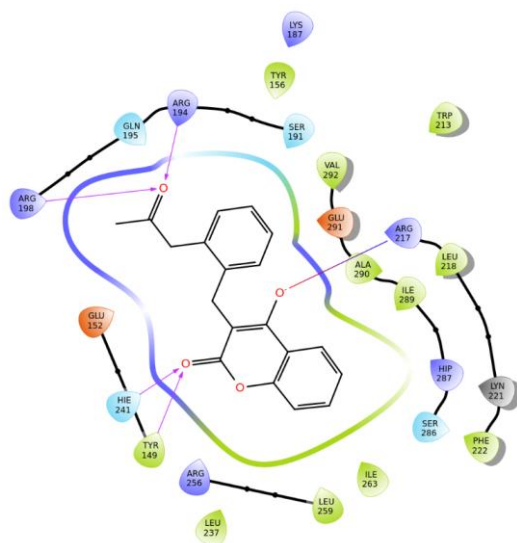

**Figure S19S20.** Binding interactions of warfarin in Sudlow site I of BSA.

#### **D5E5.** Interaction of ibuprofen with Sudlow site II

Docking calculations, using empirical scoring functions, expressed a value of free energy binding in Sudlow site II equal to -9.769 kcal / mol (**Table S8S9**). Ibuprofen

in its best pose conformation (**Figure S20S21, S21S22**) forms H – bonds with three residues of the protein (Ser488, Asn390, Arg409). In addition, the formation of the salt bridge between the carboxylic group of the ligand and Lys413 plays a key – role in the stabilization of the complex. In the low value of free energy, the orientation of the aromatic ring towards the hydrophobic residues (i.e. Leu452, Leu456, Leu406, Leu429, Val432, Cys391, Cys436, Cys437, Phe394, Phe402) plays an important role too.

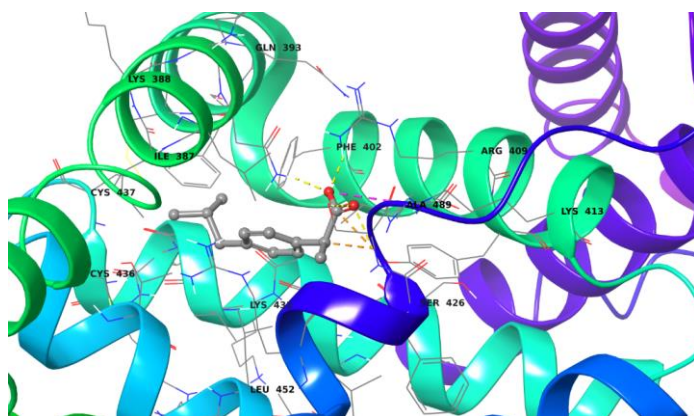

**Figure S20S21.** Best pose of ibuprofen in Sudlow site II. The three favorable hydrogen bonds and the salt bridge formed between Lys413 and the carboxylic group of the ligand can explain its highly favorable binding.

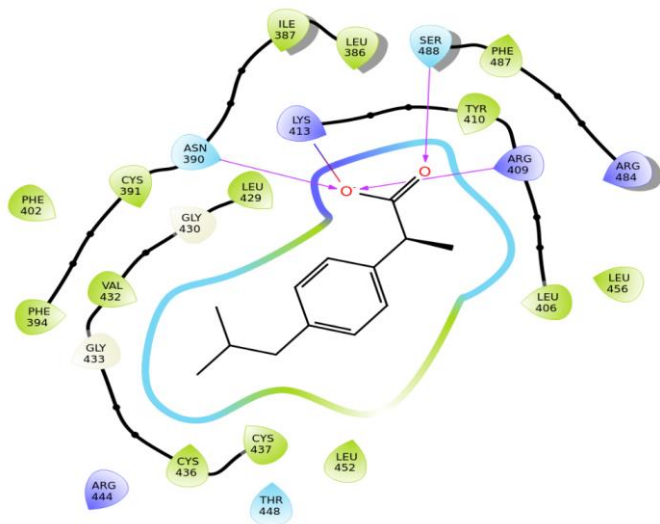

**Figure S21S22.** Binding interactions of ibuprofen in Sudlow site II of BSA.
